# Supplementary material for: Peltigera lichen thalli produce highly efficient ice nucleating agents
Source: Copernicus journal article supplement (doi:10.5194/egusphere-2024-2959), 2024-10-18
Supplement: Supplementary file 1 [file egusphere-2024-2959-supplement.pdf]

*Supplement of*

***Peltigera* lichen thalli produce highly efficient ice nucleating agents**

5

**Rosemary J. Eufemio et al.**

*Correspondence to:* Konrad Meister ([konradmeister@boisestate.edu](mailto:konradmeister@boisestate.edu))

10

## Heat treatments

Table S1 shows the ice nucleation activity of *Peltigera* IN solutions after incubation at 98°C for 1 hour. The ice nucleation activity was determined using the Vali-type assay immediately after heating. We find that all the *Peltigera* lichens show a decrease in ice nucleation activity after exposure to 98°C.

15

**Table S1.** Ice nucleation activity of undiluted *Peltigera* lichen extracts determined using a Vali-type (initial) assay. Effects of high temperature treatments on IN activity were determined. Extracts labeled N/A were not measured.

| <i>Peltigera</i> Species        | Initial $T_{50}$ (°C) | Heat Treated (°C) |
|---------------------------------|-----------------------|-------------------|
| <i>P. britannica</i> JNU22      | -5.7                  | -7.5              |
| <i>P. apthosa</i> BRW1          | -6.8                  | N/A               |
| <i>P. apthosa</i> BRW2          | -6.9                  | N/A               |
| <i>P. apthosa</i> PL729         | -6.7                  | -9.3              |
| <i>P. apthosa</i> PL708         | -6.8                  | -8.8              |
| <i>P. apthosa</i> P5057         | -8.3                  | -8.7              |
| <i>P. neopolydactyla</i> JNU22  | -6.3                  | -7.8              |
| <i>P. membranacea</i> PNW22     | -7.3                  | -8.4              |
| <i>P. neckeri</i> PNW22         | -7.5                  | -8.2              |
| <i>P. malacea</i> PL744         | -6.8                  | -9.7              |
| <i>P. neckeri</i> PL713         | -6.6                  | -8.1              |
| <i>P. neopolydactyla</i> P0309  | -6.9                  | -8.7              |
| <i>P. austroamericana</i> 34390 | -9.3                  | N/A               |
| <i>P. austroamericana</i> 34529 | -4.9                  | -9.3              |
| <i>P. dolichorrhiza</i> 34433   | -8.1                  | N/A               |
| <i>P. dolichorrhiza</i> CR-8    | -8.8                  | -9.6              |
| <i>P. dolichorrhiza</i> CR-4    | -8.7                  | N/A               |

20

## Isolation of IN-active lichen components

Aqueous extracts of *P. britannica* JNU22-derived cultures were tested for ice nucleation activity.

Droplet freezing assays show a variation of 4.4°C between the  $T_{50}$  of the most active and least active cultures.

25

**Table S2.** Ice nucleation activity of aqueous extracts (10 mg mL<sup>-1</sup>) from cultures isolated from *P. britannica* JNU22 determined using a Vali-type (initial) droplet freezing assay. Cultures are listed from highest to lowest ice nucleation activity.

| Subculture | Initial $T_{50}$ (°C) |
|------------|-----------------------|
| L01-tf-B03 | -5.2                  |
| L01-ts-A05 | -6.5                  |
| L01-ts-A02 | -6.8                  |
| L01-ts-A03 | -6.8                  |
| L01-ts-A06 | -6.9                  |
| L01-ts-A01 | -6.9                  |
| L01-ts-A04 | -7.1                  |
| L01-ts-B02 | -7.2                  |
| L01-ts-A07 | -7.3                  |
| L01-ts-B01 | -7.3                  |
| L01-ts-B03 | -7.4                  |
| L01-tf-A01 | -8.3                  |
| L01-tf-B02 | -8.3                  |
| L01-tf-B01 | -9.6                  |

30

### Freezing efficiency of the culture L01-tf-B03 isolated from *P. britannica* JNU22

The freezing spectra shown in Fig. S1 corresponds to Fig. 3 in the main text. Shown in Fig. S1 are the total number of INs active for the lichen culture, L01-tf-B03, and alive *Pseudomonas syringae* strain Cit7 at starting concentrations of 1 mg mL<sup>-1</sup>. We find that at the lowest measured dilution, L01-tf-B03 contains 10<sup>13</sup>g<sup>-1</sup> INs, while in contrast, the cumulative number of *P. syringae* INs is 10<sup>10</sup>g<sup>-1</sup>. The relatively low concentration of active bacterial INs highlights the potency of L01-tf-B03 INs compared to *P. syringae* INs.

35

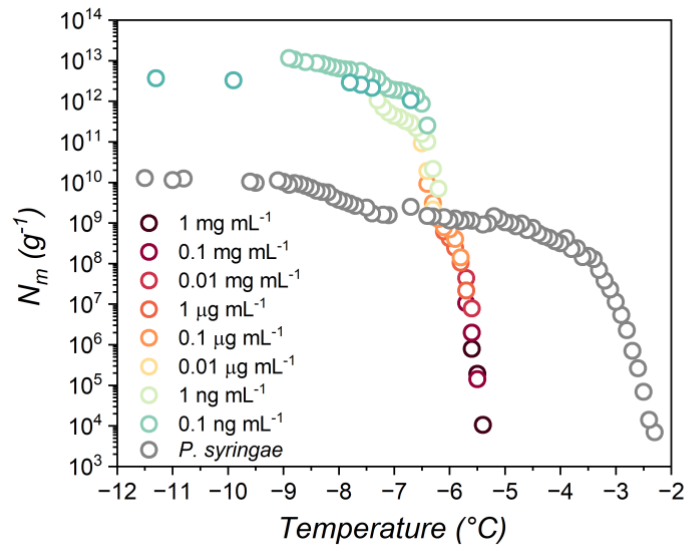

40 **Figure S1.** Dilution effects on the IN-activity of L01-tf-B03 and *P. syringae* as shown by the cumulative number of INs per unit mass ( $N_m$ ) of sample. The symbol colors of L01-tf-B03 indicate data from different dilutions and are identical to the uncolored dilutions shown for *P. syringae*.
